# Supplementary material
Source: MDPI journal article supplement (https://www.mdpi.com/search?q=ijms-20-00419)
Supplement: s001 [file ijms-20-00419-s001.pdf]

1 GAAAATAAAT AACAGAATC ATAACTAAA CAAATCAATA TCACGAAATT TGAACATCTG  
61 TAACTAAAAA TATTTTCTTT AAAATGAATA ACGCGGTCTT GTATGAGAAA AGCAATAGCT  
121 TGCAGAAGAG AGATGCTATC ATGTGTCTAG AAGAATACGC TTCGAAAATT AAGTGGAAGA  
181 AGAGTAATAA TAATATTCTT GACATAGGCT GTGGGGATGG AAGCGTGA ACTATGCTGA  
241 AGAAATATAT CCCTACTGAG TATAAGTTGC TTGGCTGTGA TATTAGCGAG AAGATGGTGA  
301 ACTTCGCGAA TGATCATCAT TGTAACGAAC AGACTTCTTT CACCGTGTTC GATATCGAGG  
361 GAGATCTACC TGAAGGCATG AAGGGAACT TCGACCACGT ATTCTCGTTC TACGCTCTGC  
421 ACTGGGTAA TAACCAAGAA CGAGCATACA ACAACATATA CAACCTTCTA AGCGAGGATG  
481 GAGAATGTTT CACGATATTC GTGGCATGGG CTCCTGTGTT TGACGTGTAC CGGGTACTCG  
541 CGCGCAACAA CAAGTGGAGT CAATGGGTGC ATGATGTGCGA CAGATACATA TCACCGTACC  
601 ACGACTCGTT GGAGCCTGAA AAAGATTTAA AGACAATGAT AGACAAAATT GGATTGCTTG  
661 ACGTCGACGT GGAATGCAAA GAATTGGTAT TCGTGTATGA CAACATACAT ATTTTGCGAA  
721 AAGCGCTAAC AGCAATCAAC CCTTTCAAAA TTCCCAAGGA AAAATATGAT GACTTCATGG  
781 AAGATTACAT GGACATATTG AAAGAACTAC AGATCTTAGA CAAGTACAAC AATAATTATG  
841 AAAAGAGCGT TGAATTCAAT TACCGTTTGC TTGTAGTGTA TGCTCGGAAG CCTGACTCGC  
901 AGGATAAAA GTTAGAAGCA CTAAATGGGC AGACGTAGGT ATTTTAAATA TACATATATC  
961 TATGGTAAAA CACGGTGTA AACAGTTATT AGTAGTTAAG GATGAATGTA TAGTGTATCT  
1021 CTTCAGGTTT AGTTTT

**Figure S1.** mRNA sequence of *HaJHAMT* (GenBank accession number KX289532.1). Fragment used as dsJHAMT was underlined.

1 AAGACTACAA CATGGCAGTT TATAGGAGCT TGATATTGCT TGCATTTGCG AGTTGTGTAC  
61 TTTTCGGAAG AGGAACACTT TTCAATCCAT GCAGTAAAAA TGACATAAAA TGCTTGAGTG  
121 GAGCAACCGA ATCTTTTTTG GAAAAAATA GCAATGGTTT TCCGGATTAC AAAATCAAGG  
181 CTATTGACCC TTTGATCATT CTGAGTTAA AAGTCGTGGT CGACGAAGGC TTGGGACTGG  
241 TCTATGATTT CAAAAACATA AATATAACTG GACTGAAGAC GCAGCAGATA TCAGACTTCA  
301 AAATGGATAC AGACAAGAAA TCTGTGGTTT TAAAAACAAA AGCTGTTTTG AATATCGTGG  
361 GTGATGTCAA AATCGAATTC GCCAAGCAAA ATAAAGTTTT TAATGGAGCT TATACAGCTT  
421 CAACAACATGC TATAGGAAGC TCACAATATG GCTACAGTTT TAAGAAAAA GATGATAAAG  
481 ATCACTTCGT AGTCGGCCCA GAGGTGAATA CATGTGAAAT CATTGGAGAA CCGAACGTGG  
541 ATATTGGAGA TGATTTACAA AAGGCCTTGG ACAGTGACTC CGATGCACAG GCTCTGAAAC  
601 CTGATTACGA GACTAACAAG GTGGCTTAC GGAAGAAGAC GCTATGCCAT ATTGTAGAAG  
661 CCGCTACGT CACCGTCATA CACAACATCA GGGCAATCGC AGATATCTTC CCTAAGGAAG  
721 CCTTTTTTAC TGACATTTAA AAGCCGCTA CGTCACCGTC ATACACAACA TCAGGGCAAT  
781 CGCAGATATC TTCCCTAAGG AAGCCTTTTT CACTGACATT TAATA

**Figure S2.** mRNA sequence of *HaJHBP* (GenBank accession number KX289533.1). Fragment used as dsJHBP was underlined.

**Table S1.** Primers used in this study.

| <b>Primer</b> | <b>Sequence</b>                                                         | <b>Amplification Purpose</b>                          |
|---------------|-------------------------------------------------------------------------|-------------------------------------------------------|
| OPF           | 5'- <u>CCATGGGGT</u> CCTTGTAGGTCTTGTAGT-3',<br><i>NcoI</i> underlined   | Primers for amplification of<br><i>OP166</i> promoter |
| OPR           | 5'- <u>CCCCGGG</u> CGGAAATTATCGCAAGATAAGG-3',<br><i>SmaI</i> underlined |                                                       |
| Pin           | 5'-GAAATTTTTGAATCTTGCAGTCAGC-3'                                         | Primers for the detection of<br>dsJHBP                |
| JPR           | 5'-TTCGTAGTCGGCCCAGAGGT-3'                                              |                                                       |
| JTF           | 5'-CAACGAGTCGTGGTACGGTGAT-3'                                            | Primers for the detection of<br>dsJHAME               |
| Pin           | 5'-GAAATTTTTGAATCTTGCAGTCAGC-3'                                         |                                                       |
| P20-F         | 5'-ATTGCTTGCATTTGCGAGTTGTGT-3'                                          | <i>HaJHBP</i> specific primers for<br>qRT-PCR         |
| P20-R         | 5'-TCCGGGAAACCATTTGCTTGT-3'                                             |                                                       |
| P35-F         | 5'-GGGTACTCGCGCGCAACAACAA-3'                                            | <i>HaJHMT</i> specific primers for<br>qRT-PCR         |
| P35-R         | 5'-ATCCTGCGAGTCAGGCTTCCG-3'                                             |                                                       |
| P41F          | 5'-AGGAAGCACAGGAAGAGGA-3'                                               | <i>HaRBP</i> specific primers for<br>qRT-PCR          |
| P41-R         | 5'-AAGCACCAGTCCACGGAAA-3'                                               |                                                       |
| P42-F         | 5'-AATGCCCCGTCAGTACGA-3'                                                | <i>HaECR</i> specific primers for<br>qRT-PCR          |
| P42-R         | 5'-TGAGCTTCTCATTGAGGA-3'                                                |                                                       |
| P43-F         | 5'-ATCCAAGCCACTCACAGC-3'                                                | <i>HaMET</i> specific primers for<br>qRT-PCR          |
| P43-R         | 5'-AGCGGCAAGTCTCAACAC-3'                                                |                                                       |
| P44-F         | 5'-GGTCCTGACAGCAATGTT-3'                                                | <i>HaUSP</i> specific primers for<br>qRT-PCR          |
| P44-R         | 5'-AGCTCCAGCTGACTGAAG-3'                                                |                                                       |
| P21-F         | 5'-CCTGGTATTGCTGACCGTATGC-3'                                            | <i>HaACTIN</i> specific primers for<br>qRT-PCR        |
| P21-R         | 5'-CTGTTGGAAGGTGGAGAGGGAA-3'                                            |                                                       |
